# Supplementary material for: Enhancement of Z-scheme behavior by coupling local WO 3− x –WS 2 with Au nanoparticles for efficient photoelectrochemical degradation of methylene blue
Source: Royal Society of Chemistry journal article supplement (doi:10.1039/d5cy01071c), 2025-11-14
Supplement: d5cy01071c1.pdf [file d5cy01071c1.pdf]

**1 Enhancement of Z-scheme behavior by coupling local WO<sub>3-x</sub>-WS<sub>2</sub> with Au**  
**2 nanoparticles for efficient photoelectrochemical degradation of methylene blue**

3 Qian Guo<sup>a</sup>, Ying Wen<sup>a</sup>, Tian Zhang<sup>a</sup>, Long Ren<sup>b</sup>, Xiaohui Ren<sup>a,\*</sup>, Yang Li<sup>a</sup>, Huanyu He<sup>a</sup>, Huating  
4 Liu<sup>c,\*</sup>, Ye Zhang<sup>d,\*</sup>, Hua Zhang<sup>a</sup>, Hongwei Ni<sup>a</sup>

5 <sup>a</sup> School of Metallurgy and Energy , Wuhan University of Science and Technology, Wuhan  
6 430081, P. R. China

7 <sup>b</sup> Institute for Quantum Science and Technology, Shanghai University, Shanghai 200444, P. R.  
8 China

9 <sup>c</sup> School of Electrical and Electronic Engineering, Wuhan Polytechnic University, Wuhan 430023,  
10 P. R. China

11 <sup>d</sup> Lab of Optoelectronic Technology for Low Dimensional Nanomaterials, School of Chemistry  
12 and Chemical Engineering, University of South China, Hengyang 421001, P. R. China

13 \* Corresponding authors: Xiaohui Ren (xhren@wust.edu.cn); Huating Liu (liuht@whpu.edu.cn);  
14 Ye Zhang (yezhang@usc.edu.cn).

15

16 **Table of Contents**

- 17 **Fig. S1.** SEM images of  $\text{WO}_{3-x}$  synthesized by (a) 180°C, 4 h, (b) 8 h and (c) 36 h.
- 18 **Fig. S2** SEM images of  $\text{WO}_{3-x}$  synthesized by (a) 120°C, (b) 140 °C, (c) 160°C and (d)
- 19 200°C.
- 20 **Fig. S3.** Comparison of the efficiency of  $\text{WO}_{3-x}$  catalysts synthesized at different
- 21 temperatures for degradation of MB.
- 22 **Fig. S4** The stability of  $\text{WO}_{3-x}$  synthesized by 180 °C (a) 4 h, (b) 8 h and (c) 36 h.
- 23 **Fig. S5.** The stability of  $\text{WO}_{3-x}$  synthesized by (a) 120 °C, (b) 140 °C, (c) 160 °C and
- 24 (d) 200 °C.
- 25 **Fig. S6.** Schematic diagram of in-situ sulfurization.
- 26 **Fig. S7.** The absorbance standard curve of MB.
- 27 **Fig. S8.** CV curves of (a)  $\text{WO}_{3-x}$ , (b)  $\text{WO}_{3-x}\text{-WS}_2$  and (c)  $\text{WO}_{3-x}\text{@Au-WS}_2$ .
- 28 **Fig. S9.** (a) LSV curves of  $\text{WO}_{3-x}$ ,  $\text{WO}_{3-x}\text{-WS}_2$  and  $\text{WO}_{3-x}\text{@Au-WS}_2$ ; (b) ECSA for
- 29  $\text{WO}_{3-x}$ ,  $\text{WO}_{3-x}\text{-WS}_2$  and  $\text{WO}_{3-x}\text{@Au-WS}_2$ .
- 30 **Fig. S10.** SEM and EDS images of  $\text{WO}_{3-x}\text{@Au}$ .
- 31 **Fig. S11.** Thickness of prepared (a)  $\text{WO}_{3-x}$ , (b)  $\text{WO}_{3-x}\text{-WS}_2$ ,  $\text{WO}_{3-x}\text{@Au}$  and  $\text{WO}_{3-x}\text{@Au-WS}_2$ .
- 32  $\text{x@Au-WS}_2$ .
- 33 **Fig. S12.** Comparison of the degradation efficiency for different pollutants.
- 34 **Fig. S13.** Degradation of MB after ten consecutive cycles.
- 35 **Fig. S14.** The cell diagrams of (a)  $\text{WO}_{3-x}\text{-WS}_2$ , (b)  $\text{WS}_2\text{-Au}$  and (c)  $\text{WO}_{3-x}\text{@Au}$ .
- 36 **Fig. S15.** Side and top views of the charge density difference of  $\text{WO}_{3-x}\text{-WS}_2$ .
- 37 **Fig. S16.** The cell diagrams and top views of the charge density difference of (a, b)
- 38  $\text{WO}_{3-x}\text{-WS}_2\text{@Au}$  and (c, d)  $\text{WO}_{3-x}\text{@Au-WS}_2$ .
- 39 **Fig. S17.** VB XPS spectra of (a)  $\text{WO}_{3-x}$ , (b)  $\text{WO}_{3-x}\text{-WS}_2$  and (c)  $\text{WO}_{3-x}\text{@Au-WS}_2$ .
- 40 **Fig. S18.** Tauc's plot of (a)  $\text{WO}_{3-x}$ , (b)  $\text{WO}_{3-x}\text{-WS}_2$ .
- 41 **Fig. S19.** SEM and EDS images of  $\text{WO}_{3-x}\text{@Au-WS}_2$ .
- 42 **Fig. S20.** Visual comparison of (MB) degradation.
- 43 **Table S1.** Degradation efficiency of pollutants by different  $\text{WO}_3$ -based catalysts.
- 44 **Table. S2** Three times of pollutants Degradation by  $\text{WO}_{3-x}$ ,  $\text{WO}_{3-x}\text{-WS}_2$  and  $\text{WO}_{3-x}\text{@Au-WS}_2$ .
- 45  $\text{x@Au-WS}_2$ .

46 **Table. S3** Degradation efficiency of pollutants by individual  $\text{WO}_3$  and  $\text{WS}_2$ .

## 47 **Experimental Section**

### 48 **Materials**

49 Propanol ( $\text{C}_3\text{H}_8\text{O}$ , AR, 99.7%), ethanol ( $\text{C}_2\text{H}_5\text{OH}$ , AR, 99.7%), thiourea ( $\text{CH}_4\text{N}_2\text{S}$ ,  
50 AR.), Methylene Blue ( $\text{C}_{16}\text{H}_{18}\text{ClN}_3\text{S}\cdot 3\text{H}_2\text{O}$ ), sodium oxalate ( $\text{Na}_2\text{C}_2\text{O}_4$ , AR, 99.8%)  
51 and anhydrous sodium sulphate ( $\text{Na}_2\text{SO}_4$ , AR, 99.0%) were purchased from  
52 Sinopharm Chemical Reagent Co. Hydrochloric acid ( $\text{HCl}$ , 36%) was purchased from  
53 Henan Kaifeng Dongda Chemical Co. Sodium citrate ( $\text{C}_6\text{H}_5\text{Na}_3\text{O}_7\cdot 2\text{H}_2\text{O}$ , 99%),  
54 sodium tungstate ( $\text{Na}_2\text{WO}_4\cdot 2\text{H}_2\text{O}$ , AR, 99.5%), and chloroauric acid trihydrate  
55 ( $\text{HAuCl}_4\cdot 3\text{H}_2\text{O}$ , 48-50% Au-based) were purchased from Shanghai McLean  
56 Biochemistry and Technology Co. Ammonium chloride ( $\text{NH}_4\text{Cl}$ , 99.5%) was  
57 purchased from Tianjin Damao Chemical Reagent Factory. FTO conductive glass (7  
58  $\Omega$ , transmittance $\geq 80\%$ ) purchased from Wuhan Jingge Solar Technology Co.  
59 Hydrogen peroxide 30% aqueous solution ( $\text{H}_2\text{O}_2$ ) purchased from Tianjin Tianli  
60 Chemical Reagent Co. Tungstic acid ( $\text{H}_2\text{WO}_4$ , AR) was purchased from Chemical  
61 Reagent No.2 Factory. The deionized water used in this experiment was homemade in  
62 the laboratory with a resistivity test value of  $18.2 \text{ M}\Omega \text{ cm}^{-1}$ .

### 63 **Hydrothermal preparation of $\text{WO}_{3-x}$**

64 The FTO conductive glass was first ultrasonically cleaned three times with  
65 propanol, ethanol and distilled water for 15 minutes, dried and prepared for use. 0.5 M  
66 tungstic acid and 0.5 M  $\text{H}_2\text{O}_2$  solution were mixed and stirred for 24 h to obtain the  
67 tungstic acid seed layer. The seed layer was evenly coated on the front side of FTO  
68 conductive glass, and then heated in a muffle furnace at  $450^\circ\text{C}$  for 30 minutes, and  
69 then cooled naturally and prepared for use.

70 Then, the precursor solution was obtained by adding 0.134 g of sodium tungstate,  
71 0.402 g of sodium oxalate and 0.259 g of ammonium chloride to 30 ml of distilled  
72 water, stirring for 30 min, and adding concentrated hydrochloric acid dropwise by  
73 froth to adjust the  $\text{pH}=1$ .

74 Finally, the prepared glass was placed vertically into the tetrafluoroethylene liner  
75 containing the precursor solution, and the hydrothermal temperature was controlled at

120°C, 140°C, 160°C, 180°C, and 200°C. The hydrothermal temperature was set at 120°C, 140°C, 160°C, 180°C, and 200°C. The hydrothermal time was 4 h, 8 h, 12 h and 36 h. After the hydrothermal reaction, the glass pieces were removed and cleaned and dried to obtain the FTO loaded with WO<sub>3-x</sub>.

#### **Preparation of WO<sub>3-x</sub>@Au**

WO<sub>3-x</sub>@Au catalysts were prepared by photodeposition. Mixing 1 mL of chloroauric acid with 29 mL of sodium citrate stir it well and placed in a quartz glass reactor for spare put it into a quartz glass reactor. The glass side containing WO<sub>3</sub> was placed into the mixed solution by aligning the glass side with the light source, controlling the distance at about 5 cm, and photodeposition was carried out under the irradiation of UV light to obtain WO<sub>3-x</sub>-Au.

#### **Preparation of in-situ sulfurization samples**

Grinding of 0.2 g of thiourea was incorporated into the porcelain boat a, the prepared FTO slant loaded with catalyst was incorporated into the porcelain boat b, and the porcelain boat 1 was placed in front of the porcelain boat b, and annealed at 450°C under Ar atmosphere for 2 h. Catalyst loaded with WS<sub>2</sub> was received.

#### **Material characterization**

The phase composition and chemical state of the samples were characterized by X-ray diffraction (XRD, XPERT MPD Pro), X-ray photoelectron spectroscopy (XPS, Thermo Scientific K-Alpha) and Raman spectroscopy (Raman, Horiba LabRAM HR Evolution). The surface morphology of the samples was obtained by field emission scanning electron microscopy at 10 KV (FE-SEM, FEI Nova NANOSEM 400), TEM, HR-TEM, EDS and elemental mapping (JEM-F200). Free radical and retrograde studies of the samples during reaction were carried out using a steady state/transient fluorescence spectrometer (Edinburgh FLS1000). Detection of absorbance was carried out by a visible photometer (V-T3). Ultraviolet-visible (UV-vis) spectroscopy were recorded on a pgeneral TU-1901 Dual-beam UV-Vis spectrophotometer equipped with an integrating sphere, and BaSO<sub>4</sub> powders were used as a reflectance standard. Electrochemical measurements were carried out with a CHI660E electrochemical workstation (Shanghai Chenhua, China).

## 106 Experiments for PEC degradation

107 The photoelectrocatalytic activity of the prepared samples was evaluated by  
108 simulating the degradation of MB solution under visible light. In the  
109 photoelectrocatalysis experiment, a magnetic stirrer was placed at the bottom of a  
110 quartz glass reactor, the bias voltage was set to 0.7 V vs. Ag/AgCl, and the xenon  
111 lamp was adjusted to 100 mW cm<sup>-2</sup>. The reactor was placed approximately 5 cm away  
112 (20 mW cm<sup>-2</sup>) from the xenon lamp light source. 30 mL of 10 ppm MB solution was  
113 added to the reactor and the prepared sample was held submerged in the solution  
114 using an electrode holder. Before the start of the photoreaction, it was left for 30  
115 minutes in dark to reach adsorption equilibrium. After the start of the photoreaction, 3  
116 mL of the mixed solution was taken at intervals, centrifuged and the supernatant was  
117 extracted. The absorbance at 664 nm (absorption peak of MB) was determined by  
118 UV-visible photometer. The MB degradation rate was calculated as follows:

$$119 \quad \eta = \frac{C_0 - C}{C_0} \times 100\% \quad (1)$$

120 Where:  $\eta$ -degradation rate, %;

121  $C$ -The MB solution concentration for each time period, mol L<sup>-1</sup>;

122  $C_0$ -The MB solution's initial concentration, mol L<sup>-1</sup>.

123 The photocurrent signals were recorded without applied potential using a three-  
124 electrode system, with a Pt wire and Ag/AgCl electrode for the counter and reference  
125 electrodes, respectively.

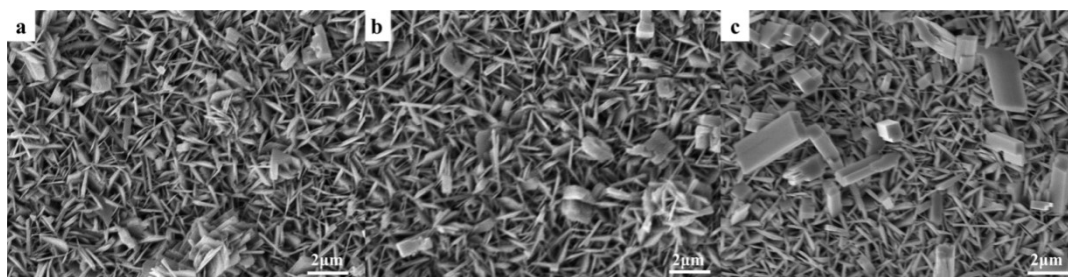

126  
127 **Fig. S1.** SEM images of WO<sub>3-x</sub> synthesized by (a) 180°C, 4 h, (b) 8 h and (c) 36 h.

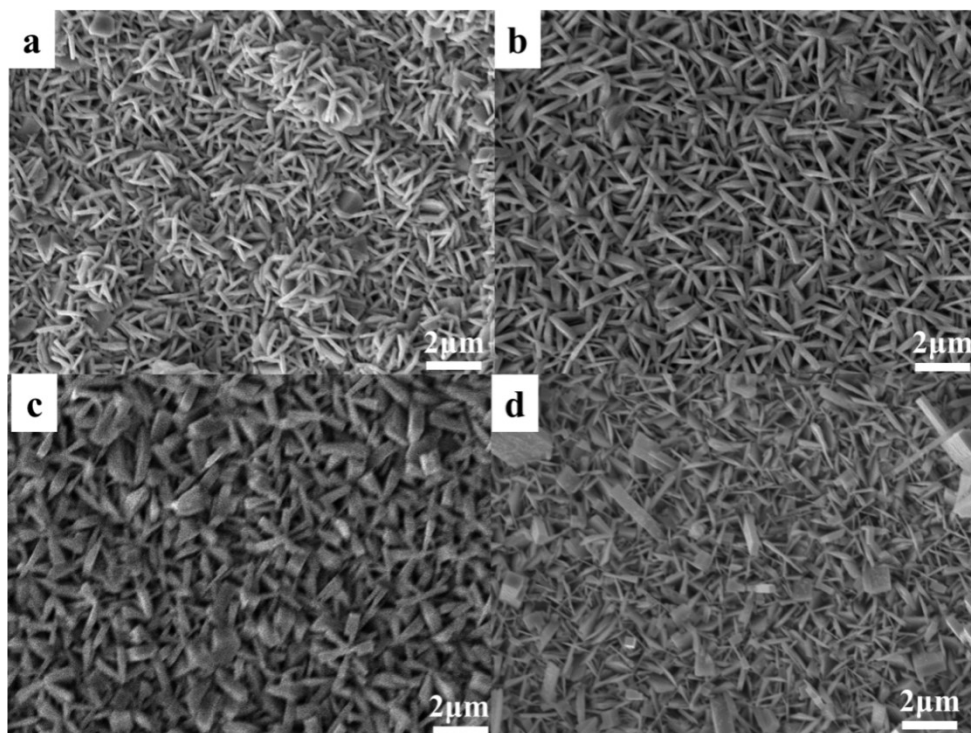

128  
129 **Fig. S2.** SEM images of  $\text{WO}_{3-x}$  synthesized by (a) 120°C, (b) 140°C, (c) 160°C and (d) 200°C.

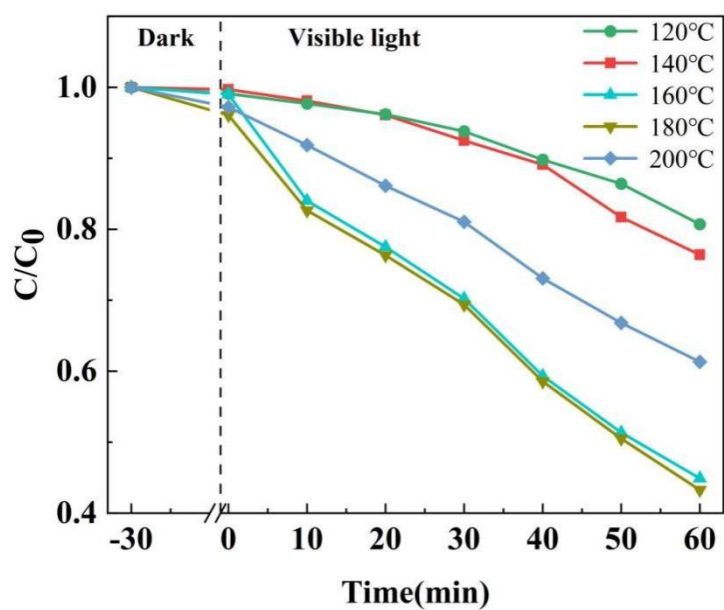

130  
131 **Fig. S3.** Comparison of the efficiency of  $\text{WO}_{3-x}$  catalysts synthesized at different temperatures for  
132 degradation of MB.  
133

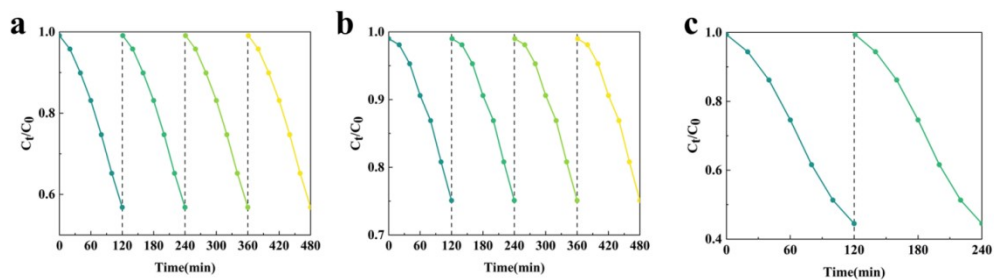

134

135 **Fig. S4.** The stability of  $\text{WO}_{3-x}$  synthesized by 180°C (a) 4 h, (b) 8 h and (c) 36 h.

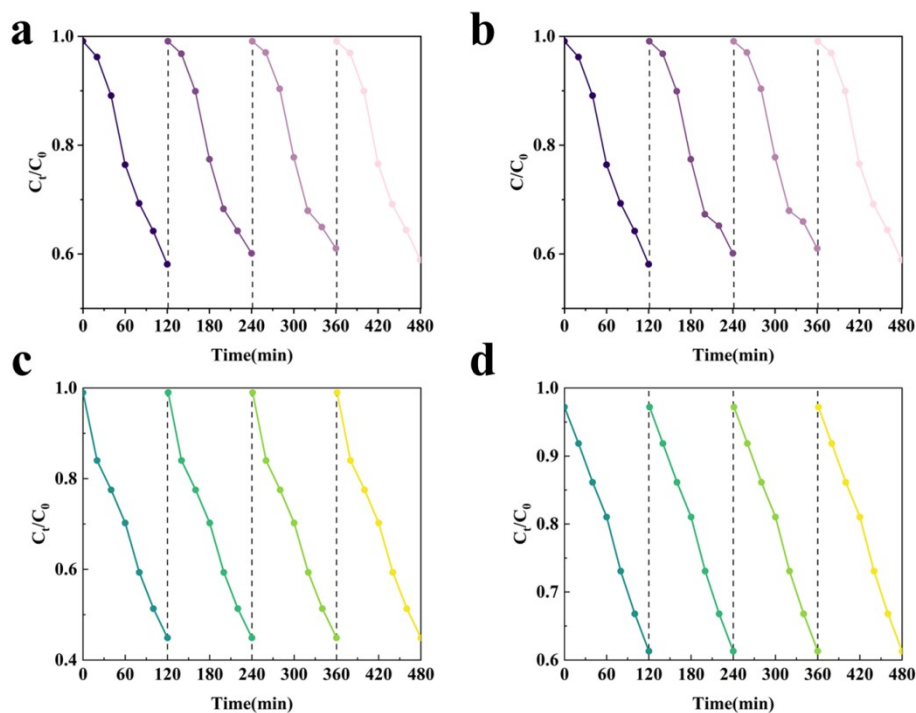

136

137 **Fig. S5.** The stability of  $\text{WO}_{3-x}$  synthesized by (a) 120°C, (b) 140°C, (c) 160°C and (d) 200°C.

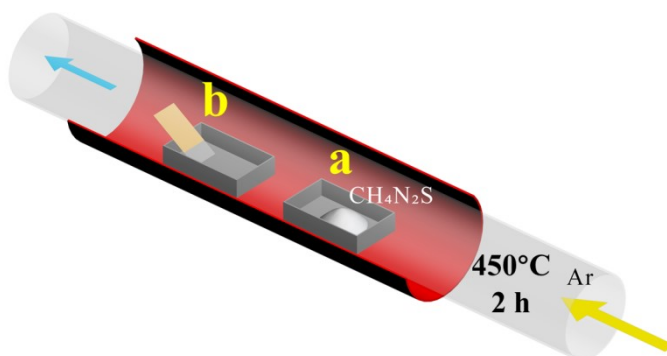

138

139 **Fig. S6.** Schematic diagram of in-situ sulfurization.

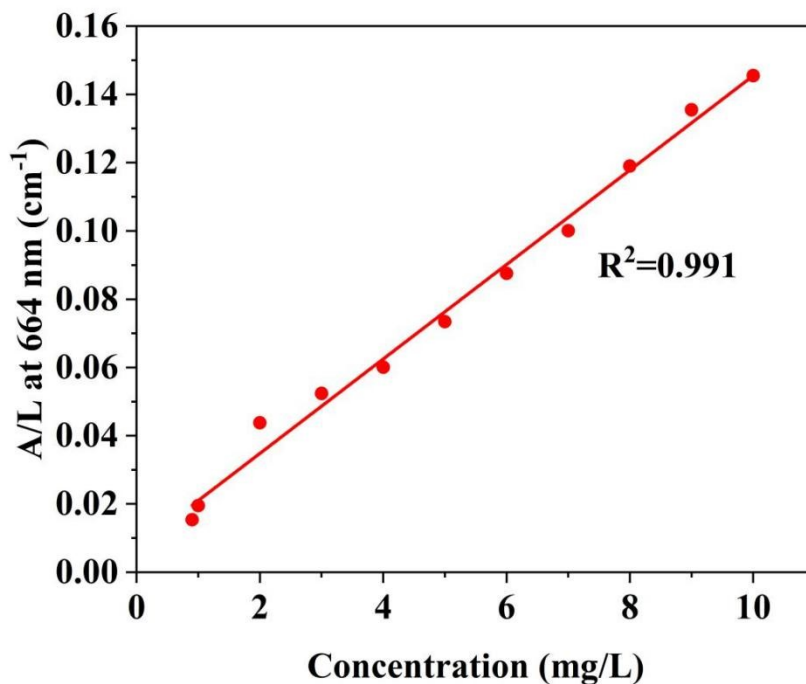

140

141 **Fig. S7.** The absorbance standard curve of MB.

142 Firstly, the curve of standard MB was determined. Weigh 10 mg of MB and add it  
 143 to 1000 ml of water, stir well to get 10 mg L<sup>-1</sup> of MB solution. Then the solution of 1-9  
 144 mg L<sup>-1</sup> was obtained by taking samples of methylene blue and diluting them  
 145 respectively. The absorbance at 664 nm was measured by UV-visible photometer and  
 146 the corresponding primary curve was made. As shown in Fig. S7, there was a linear  
 147 relationship between absorbance and concentration and  $R^2=0.991$ , which proved that  
 148 there was a linear relationship between the two.

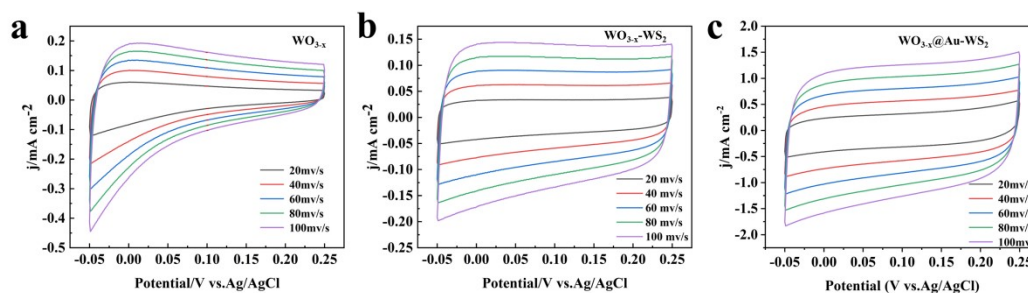

149

150 **Fig. S8.** CV curves of (a)  $WO_{3-x}$ , (b)  $WO_{3-x}-WS_2$  and (c)  $WO_{3-x}@Au-WS_2$ .



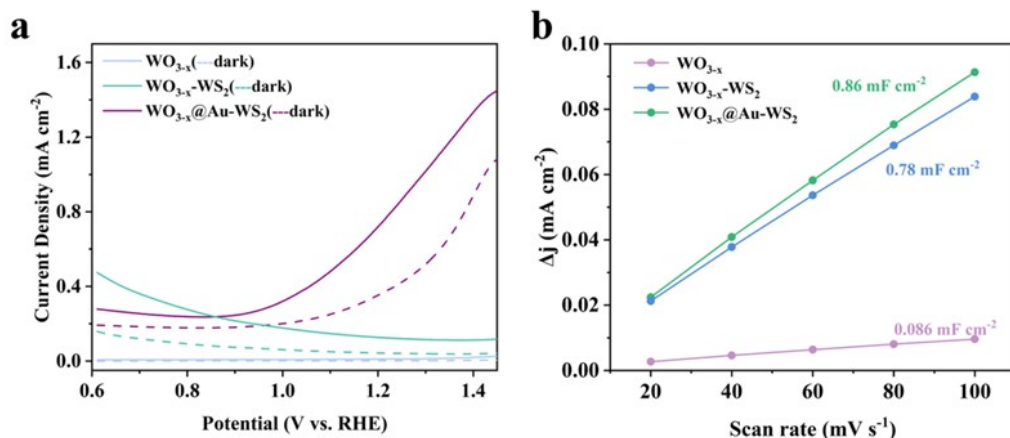

151  
152 **Fig. S9.** (a) LSV curves of  $\text{WO}_{3-x}$ ,  $\text{WO}_{3-x}\text{-WS}_2$  and  $\text{WO}_{3-x}\text{@Au-WS}_2$ ; (b) ECSA for  $\text{WO}_{3-x}$ ,  $\text{WO}_{3-x}\text{-WS}_2$  and  $\text{WO}_{3-x}\text{@Au-WS}_2$ .

154 According to the LSV data (Fig. S9a), it can be seen that the catalyst  
155 photogenerated electrons increase after the addition of light, while the photocurrent  
156 decreases without the addition of light, which clearly concludes that the prepared  
157 catalysts have a greater proportion of photocatalysis in the photoelectrocatalytic  
158 process, whereas electrocatalysis plays the role of applying an electric field for the  
159 carrier mobility to play a promotional role only. Tested according to cv (Fig. S9b), the  
160  $C_{dl}$  values for  $\text{WO}_{3-x}$ ,  $\text{WO}_{3-x}\text{-WS}_2$  and  $\text{WO}_{3-x}\text{@Au-WS}_2$  were determined to be 0.09  
161  $\text{mF cm}^{-1}$ , 0.78  $\text{mF cm}^{-1}$ , and 0.86  $\text{mF cm}^{-1}$ , respectively. The enhanced catalytic  
162 degradation performance of the ternary composite can be attributed to its largest  
163 electrochemically active surface area (ECSA), which provides abundant active sites  
164 for redox reactions.

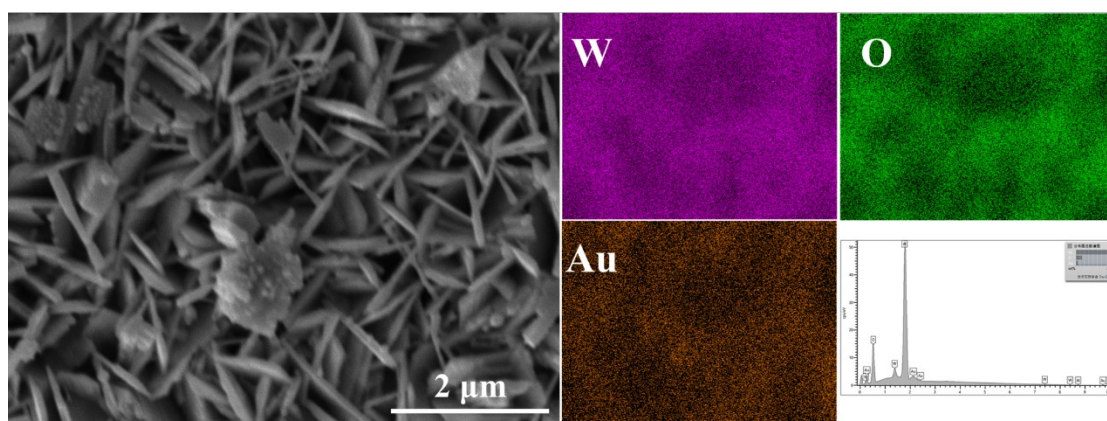

165  
166 **Fig. S10.** SEM and EDS images of  $\text{WO}_{3-x}\text{@Au}$ .

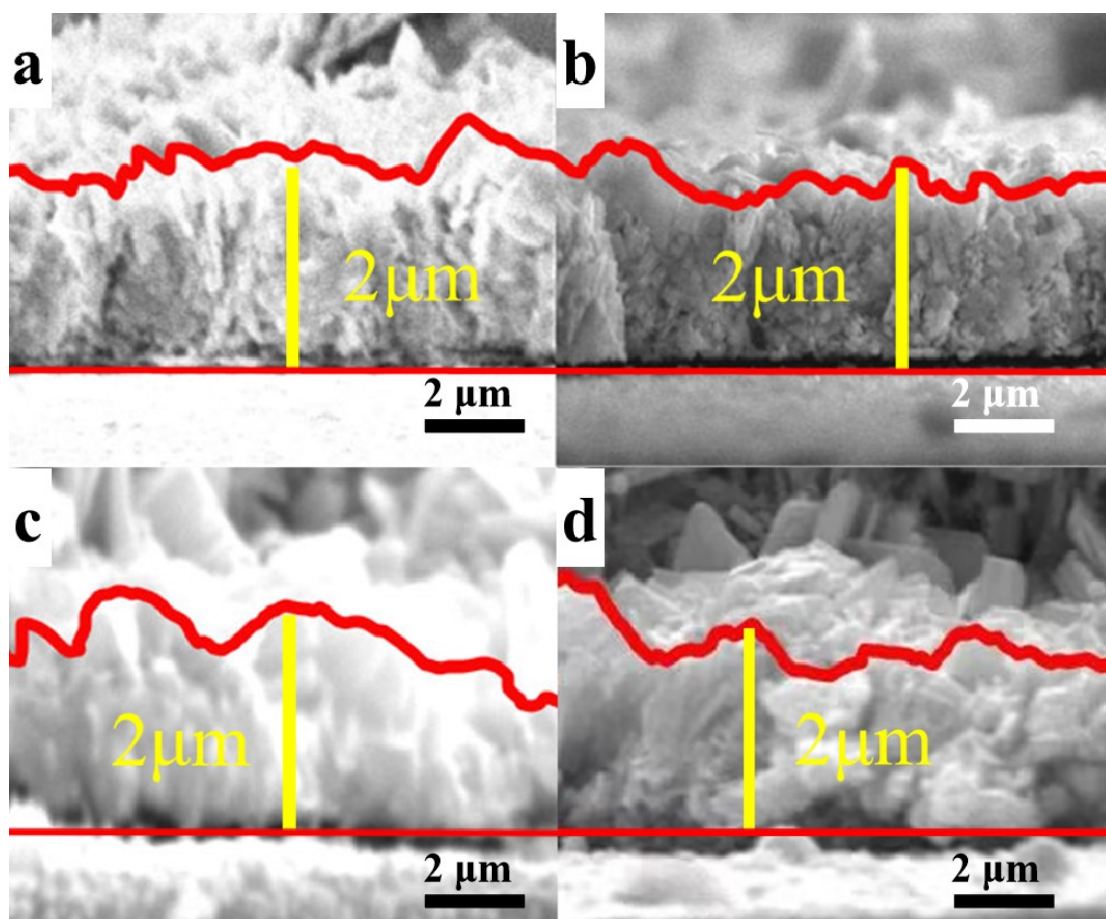

167  
168 **Fig. S11.** Thickness of prepared (a)  $\text{WO}_{3-x}$ , (b)  $\text{WO}_{3-x}\text{-WS}_2$ ,  $\text{WO}_{3-x}\text{@Au}$  and  $\text{WO}_{3-x}\text{@Au-WS}_2$ .

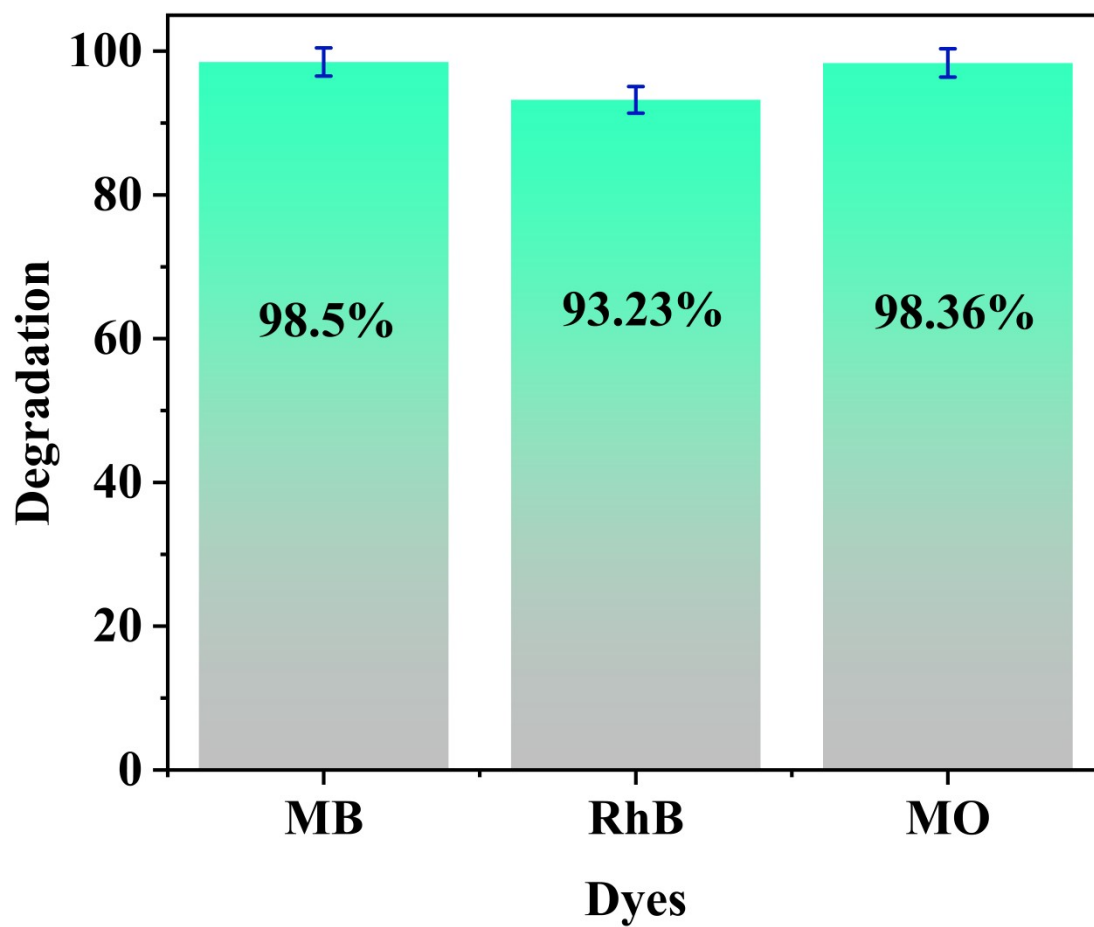

169

170 **Fig. S12.** Comparison of the degradation efficiency for different pollutants.

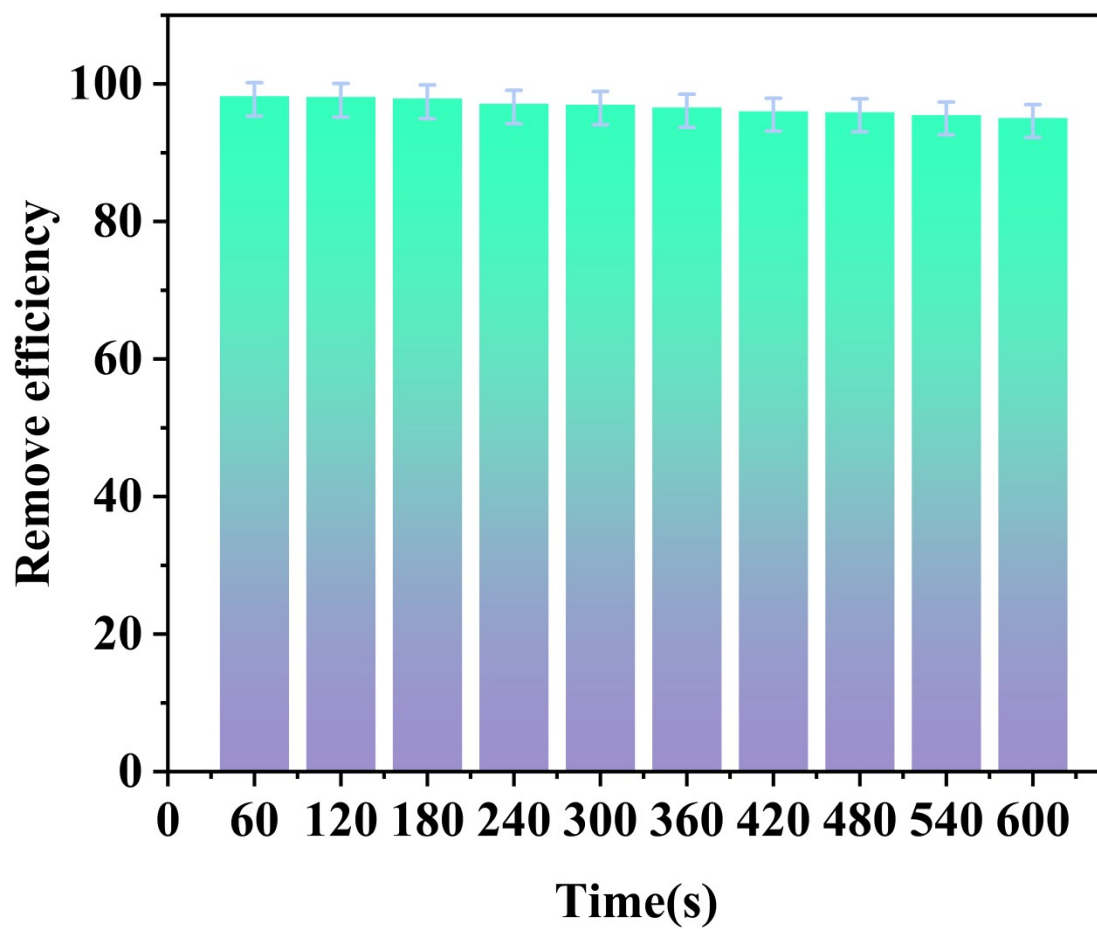

171

172 **Fig. S13.** Degradation of MB after ten consecutive cycles.

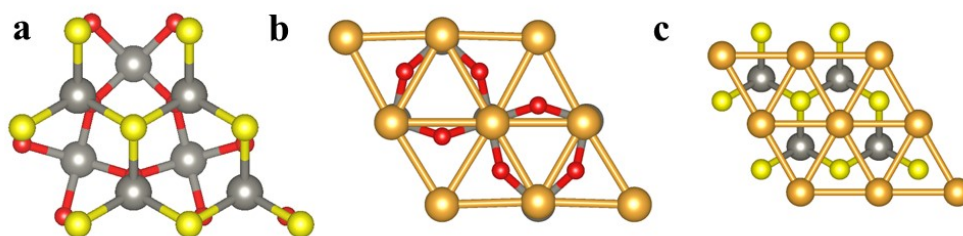

173

174 **Fig. S14.** The cell diagrams of (a)  $\text{WO}_{3-x}\text{-WS}_2$ , (b)  $\text{WS}_2\text{-Au}$  and (c)  $\text{WO}_{3-x}\text{@Au}$ .

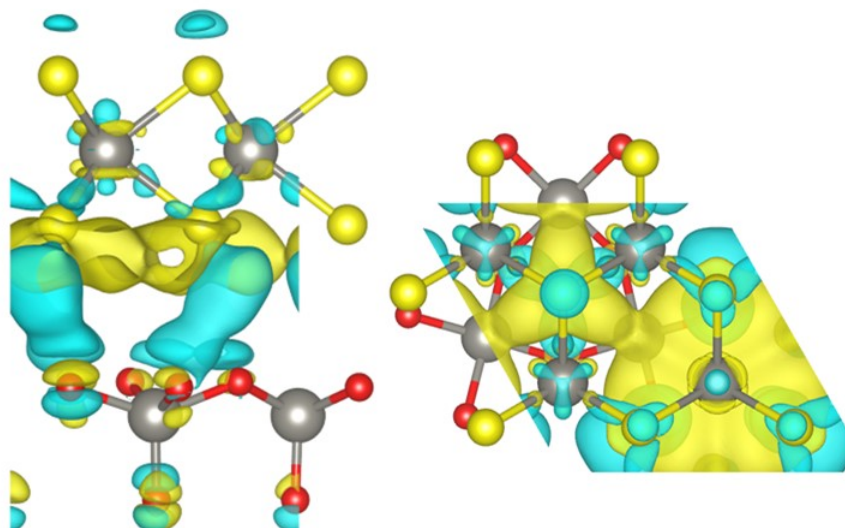

175

176 **Fig. S15.** Side and top views of the charge density difference of  $\text{WO}_{3-x}\text{-WS}_2$ .

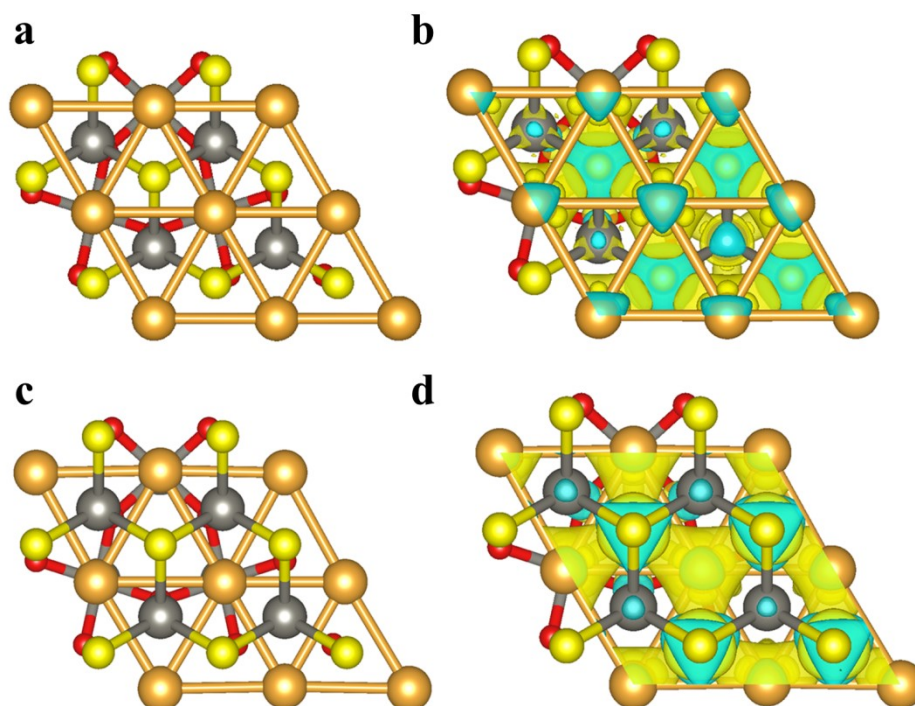

177

178 **Fig. S16.** The cell diagrams and top views of the charge density difference of (a, b)  $\text{WO}_{3-x}\text{-}$   
179  $\text{WS}_2\text{@Au}$  and (c, d)  $\text{WO}_{3-x}\text{@Au-WS}_2$ .

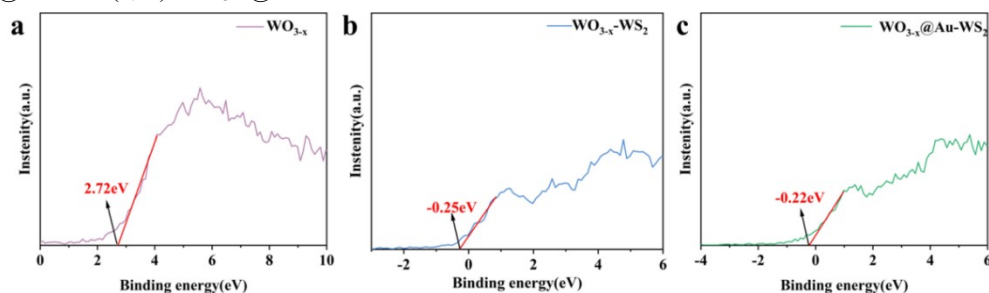

180

181 **Fig. S17.** VB XPS spectra of (a)  $\text{WO}_{3-x}$ , (b)  $\text{WO}_{3-x}\text{-WS}_2$  and (c)  $\text{WO}_{3-x}\text{@Au-WS}_2$ .

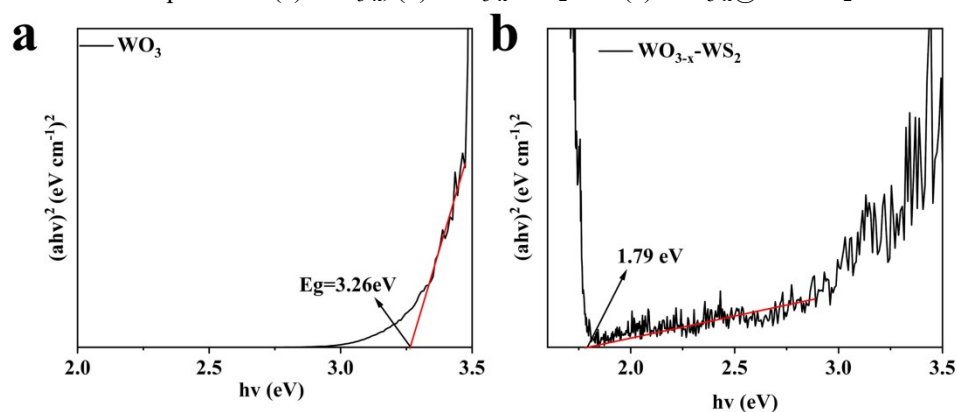

182

183 **Fig. S18.** Tauc's plot of (a)  $\text{WO}_{3-x}$ , (b)  $\text{WO}_{3-x}\text{-WS}_2$ .



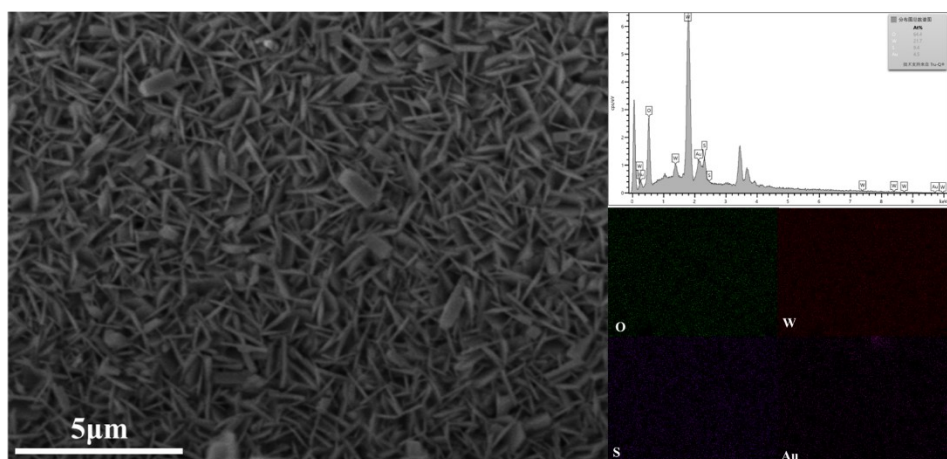

184  
185 **Fig. S19.** SEM and EDS images of  $\text{WO}_{3-x}\text{@Au-WS}_2$ .

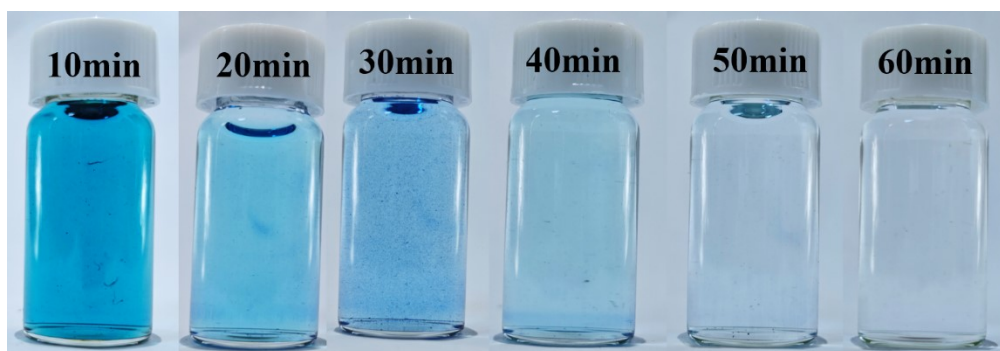

186  
187 **Fig. S20.** Visual comparison of (MB) degradation

| Catalyst                               | Degraded substance         | Degradation time/min | Remove efficiency/% | Ref |
|----------------------------------------|----------------------------|----------------------|---------------------|-----|
| $\text{WO}_3/\text{Au}/\text{FeOOH}$   | Tetracycline hydrochloride | 50                   | 99                  | 1   |
| $\text{WO}_3$                          | TC                         | 90                   | 99                  | 2   |
| hm-m- $\text{WO}_3/\text{W}$           | BPA                        | 120                  | 99                  | 3   |
| hm-m- $\text{WO}_3/\text{W}$           | TOC                        | 120                  | 84.5                | 3   |
| $\text{Bi}_2\text{MoO}_6/\text{WO}_3$  | RhB                        | 240                  | 80.1                | 4   |
| $\text{BiOI}-\text{WO}_3$              | 3-CP                       | 90-                  | 91.1                | 5   |
| $\text{CQDs}/\text{WO}_3/\text{TiO}_2$ | BPA                        | 120                  | 75.66               | 6   |
| $\text{TiO}_2\text{-NT}/\text{WO}_3$   | PPB                        | 30                   | 99                  | 7   |
| $\text{WO}_3/\text{TiO}_2$             | BA                         | 320                  | 66                  | 8   |
| $\text{WO}_3$                          | the brilliant blue         | 240                  | 92                  | 9   |

|                                                 |      |     |      |    |
|-------------------------------------------------|------|-----|------|----|
| WO <sub>3</sub> /W                              | TC   | 60  | 90   | 10 |
| WO <sub>3</sub> /BiVO <sub>4</sub>              | MB   | 180 | 94   | 11 |
| s-i-WO <sub>3</sub>                             | BPA  | 300 | 93.7 | 12 |
| CoOOH/WO <sub>3</sub>                           | 4-FP | 150 | 99.9 | 13 |
| Bi <sub>2</sub> O <sub>3</sub> -WO <sub>3</sub> | NOR  | 360 | 88.4 | 14 |
| CuO-Cu <sub>2</sub> O/WO <sub>3</sub>           | DON  | 180 | 87.6 | 15 |
| This work                                       | MB   | 60  | 98.5 |    |

188 **Table. S1** Degradation efficiency of pollutants by different WO<sub>3</sub>-based catalysts.

| Catalysts                                 | The first<br>degradation | The second<br>degradation | The third<br>degradation | Mean ±<br>standard<br>deviation |
|-------------------------------------------|--------------------------|---------------------------|--------------------------|---------------------------------|
| WO <sub>3-x</sub>                         | 55.21%                   | 57.93%                    | 57.12%                   | 56.72% ± 1.31%                  |
| WO <sub>3-x</sub> -WS <sub>2</sub>        | 78.95%                   | 81.23%                    | 80.42%                   | 80.20% ± 1.14%                  |
| WO <sub>3-x</sub> @Au-<br>WS <sub>2</sub> | 97.85%                   | 99.12%                    | 98.6%                    | 98.52% ± 0.63%                  |

189 **Table. S2** Three times of pollutants Degradation by WO<sub>3-x</sub>, WO<sub>3-x</sub>-WS<sub>2</sub> and WO<sub>3-x</sub>@Au-WS<sub>2</sub>.

| Catalyst          | Degraded<br>substance | Degradation<br>method | Degradation<br>time/min | Remove<br>efficiency/<br>% | Ref       |
|-------------------|-----------------------|-----------------------|-------------------------|----------------------------|-----------|
| WO <sub>3</sub>   | MB                    | PEC                   | 120min                  | 98.56%                     | 16        |
| WS <sub>2</sub>   | MB                    | photocatalysis        | 180min                  | 67.6%                      | 17        |
| WS <sub>2</sub>   | MB                    | photocatalysis        | 80min                   | 41.86%                     | 18        |
| WO <sub>3-x</sub> | MB                    | PEC                   | 60min                   | 55.1%                      | This work |

190 **Table. S3** Degradation efficiency of pollutants by individual WO<sub>3</sub> and WS<sub>2</sub>.

## 191 References

- 192 1. J. Wang, L. Jiang, F. Liu, M. Jia, M. Liu, J. Li and Y. Lai, *Chemical*  
193 *engineering journal*, 2021, **407**, 127195.
- 194 2. B. A. Koiki and O. A. Arotiba, *Heliyon*, 2023, **9**.
- 195 3. Q. Ma, R. Song, F. Ren, H. Wang, W. Gao, Z. Li and C. Li, *Applied Catalysis*  
196 *B: Environmental*, 2022, **309**, 121292.
- 197 4. Z. Zhang, C. Zhao, S. Lin, H. Li, Y. Feng and X. Gao, *Fuel*, 2021, **285**,  
198 119171.
- 199 5. S. Li, J. Liu, X. Liu, K. Yan and J. Zhang, *Electrochimica Acta*, 2024, **484**,  
200 144058.
- 201 6. Z. Liang, X. Zhang, J. Yang, Y. Cheng, H. Hou, S. Hussain, J. Liu, G. Qiao  
202 and G. Liu, *Journal of Hazardous Materials*, 2023, **443**, 130316.
- 203 7. A. S. Martins, L. Nunez and M. R. d. V. Lanza, *Journal of Electroanalytical*  
204 *Chemistry*, 2017, **802**, 33–39.
- 205 8. Y. M. Hunge, *Ceramics International*, 2017, **43**, 10089–10096.
- 206 9. Y. Hunge, A. Yadav, M. Mahadik, V. Mathe and C. Bhosale, *Journal of the*  
207 *Taiwan Institute of Chemical Engineers*, 2018, **85**, 273–281.
- 208 10. A. S. Martins, T. T. Guaraldo, J. Wenk, D. Mattia and M. V. B. Zanoni,  
209 *Journal of Electroanalytical Chemistry*, 2022, **920**, 116617.
- 210 11. W. Nareejun and C. Ponchio, *Solar energy materials and solar cells*, 2020,  
211 **212**, 110556.
- 212 12. W.-K. Wang, L.-L. Zhou, H.-Y. Cao, P.-X. Liu, X.-Y. Li, M. Fujitsuka, J. Xu  
213 and T. Majima, *Applied Surface Science*, 2023, **618**, 156686.
- 214 13. Q. Ma, Z. Ning, M. Fang, G. Zhang, H. Guo, J. Zhou and T. Wang, *Chemical*  
215 *Engineering Journal*, 2024, **498**, 155551.
- 216 14. T. Jiang, L. Cheng, Y. Han, J. Feng and J. Zhang, *Separation and Purification*  
217 *Technology*, 2020, **238**, 116428.
- 218 15. L. Cheng, T. Jiang and J. Zhang, *Science of the Total Environment*, 2021, **776**,  
219 145840.
- 220 16. Y. Hunge, M. Mahadik, V. Mohite, S. Kumbhar, N. Deshpande, K. Rajpure, A.  
221 Moholkar, P. Patil and C. Bhosale, *Journal of Materials Science: Materials in*  
222 *Electronics*, 2016, **27**, 1629–1635.
- 223 17. M. Al Qaydi, N. S. Rajput, M. Lejeune, A. Bouchalkha, M. El Marssi, S.  
224 Cordette, C. Kasmi and M. Jouiad, *Beilstein Journal of Nanotechnology*, 2024,  
225 **15**, 817–829.
- 226 18. V. Shinde, P. Tanwade, T. Katayama, A. Furube, B. Sathe and P. Koinkar,  
227 *Surfaces and Interfaces*, 2024, **46**, 104067.
- 228
